# Minority Research Training in Psychiatry

Through a 5-year, \$3.6 million grant from the National Institute of Mental Health (NIMH), the American Psychiatric Institute for Research and Education (APIRE) is seeking through the Program for Minority Research Training in Psychiatry (PMRTP) to increase the number of minority psychiatrists entering the field of psychiatric research.

The program provides medical students with funding for stipends, travel expenses, and tuition for an elective or summer experience in a research environment, with special attention paid to trainees' career development in research. In addition, stipends are available for a limited number of 1- or 2-year postresidency fellowships for minority psychiatrists. Residents may engage in full-year research training during the last year of psychiatry residency or in "year off" research training.

Training takes place at research-oriented departments of psychiatry in major U.S. medical schools and other appropriate sites throughout the country. An individual at the site (the research "mentor") is responsible for overseeing the research training experience.

Administered by APIRE, the program includes outreach efforts to identify minority medical students and residents who are potential researchers and to put them in touch with advisors who counsel them about careers in psychiatric research. Additional activities assist fellows and alumni in their research career development.

The director of the PMRTP is Darrel A. Regier, M.D., M.P.H.; the project manager is Ernesto A. Guerra. An advisory committee of senior researchers and minority psychiatrists developed guidelines for applicants and criteria for selection. The members of this committee evaluate and select trainees, oversee the research training experiences, and play a role in evaluating the effectiveness of the program.

December 1 is the deadline for applications for residents seeking a year or more of training and for postresidency fellows. For medical students, applications are due 3 months before training is to begin. Summer medical students who will start their training by June 30 should submit their applications by April 1.

For more information, call the toll-free number for the PMRTP, 1-800-852-1390, or (703)907-8622, e-mail [eguerra@psych.org](mailto:eguerra@psych.org), or write to PMRTP at the American Psychiatric Institute for Research and Education, 1000 Wilson Boulevard, Suite 1825, Arlington, VA 22209-3901.

# Gabbard's Treatments of Psychiatric Disorders, Fourth Edition

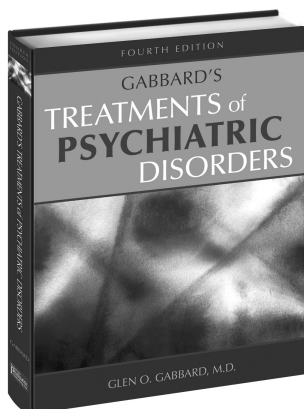

Edited by Glen O. Gabbard, M.D.

First published in 1989 and already a staple of psychiatric practice through three editions, this book has been thoroughly revised to reflect modern clinical expertise in a more accessible volume. More than 160 authorities share insights gained from firsthand experience in a state-of-the-art text that covers all major treatments in psychiatry linked to specific disorders, with a pluralistic approach that includes all major treatment modalities without focusing exclusively on favorite approaches. Not only has each chapter been completely updated, the text has been reorganized to facilitate its publication in a single volume that cuts directly to the heart of disorder-based treatments.

Scrupulously reviewed to consolidate treatment information most needed by readers, the book is organized along the lines of DSM-IV-TR to cover the entire spectrum of conditions:

disorders of childhood; cognitive disorders; substance-related disorders; psychotic disorders; mood disorders; anxiety, dissociative, and adjustment disorders; somatoform and factitious disorders; eating disorders; personality disorders; sleep disorders; and disorders of impulse control.

---

2007 • 1,056 PAGES • ISBN 978-1-58562-216-0 • HARDCOVER • \$195.00 • ITEM #62216

---

# Manual of Clinical Psychopharmacology, Sixth Edition

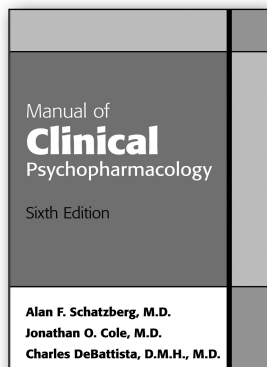

Alan F. Schatzberg, M.D., Jonathan O. Cole, M.D., and  
Charles DeBattista, D.M.H., M.D.

Clearly written in a collegial, narrative style for easy reading and comprehension, the sixth edition of this bestselling manual offers extensively updated chapters with new sections and summary tables for quick reference, including the latest information on antidepressants, antipsychotics, mood stabilizers, antianxiety agents, hypnotics, and stimulants.

This comprehensive clinical guide emphasizes practical advice—i.e., specific recommendations about dosing, titration, and combining medications—derived from the authors' extensive clinical experience. It begins with general principles of psychopharmacological treatment, including advice on legal, ethical, and economic issues. Subsequent chapters cover past, current, and future treatments for all major classes of medications, including mechanisms of action and pharmacokinetics. It also features chapters on augmentation strategies for treatment resistant disorders, emergency room treatment, pharmacotherapy for substance use disorders, and special topics such as pregnancy and mental retardation, with a fascinating final chapter on herbals and dietary supplements.

---

2007 • 720 PAGES • ISBN 978-1-58562-317-4 • PAPERBACK • \$79.00 • ITEM #62317

---

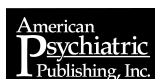

The *First* and *Last* Word in Psychiatry

TOLL FREE: 1-800-368-5777 (Mon.-Fri., 9 am to 5:30 pm, ET)

ONLINE: [www.appi.org](http://www.appi.org)

PLEASE REFERENCE PRIORITY CODE AH731 WHEN ORDERING.

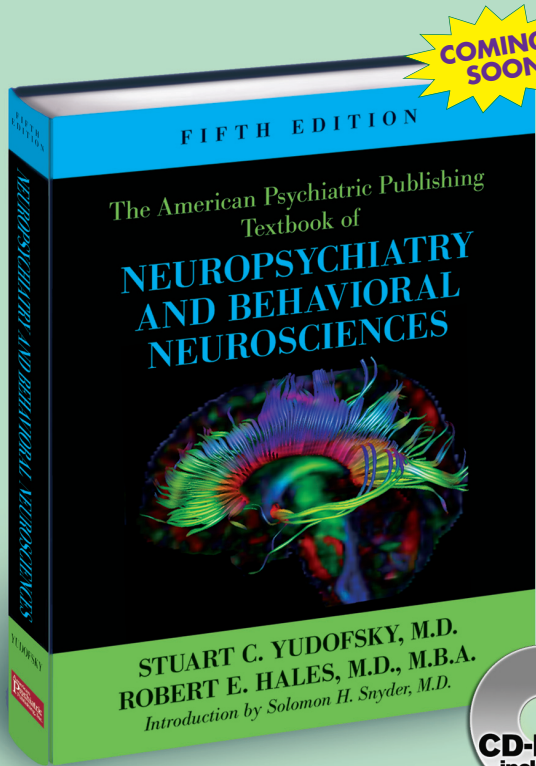

COMING SOON!

## Introducing the Fifth Edition of The American Psychiatric Publishing Textbook of Neuropsychiatry and Behavioral Neurosciences

Stuart C. Yudofsky, M.D., and Robert E. Hales, M.D., M.B.A.

With Introduction by Solomon H. Snyder, M.D.

Since the publication of the Fourth Edition of this *Textbook* six years ago, we have continued to witness explosive growth in our knowledge base in structural and functional brain imaging, electrophysiology and electrodiagnosis, cellular and molecular biology, genetics, and neuropsychopharmacology—to name just a few. To convey this intensified focus in neurosciences and to acknowledge the recognition by the American Neuropsychiatric Association and by the United Council for Neurological Subspecialties of new subspecialty status in neuropsychiatry and behavioral neurology, the editors have added

“*Behavioral Neurosciences*” to the title of this seminal work, while increasing its already impressive clinical utility and practicality. Among the many highlights of the Fifth Edition are:

- An extensively updated chapter on the cellular and molecular biology of the neuron
- An expanded chapter on the epidemiology and genetics of neuropsychiatric disorders
- An extensively revised and expanded chapter on the neuropsychiatric aspects of delirium
- A comprehensive revision and expansion of the chapter on clinical and functional neuroimaging

In this volume’s five main sections, you’ll find *basic principles of neuroscience, assessment, symptomatology, neuropsychiatric disorders, and neuropsychiatric treatments*

### CD-ROM Included!

The accompanying CD in PowerPoint presentation format contains a wealth of material to enhance classroom presentation, study, and clinical use. It includes all 170 tables and all 250 figures, many in color, with their explanatory legends, easy to access and organized chapter by chapter with context provided—plus, Highlights for the Clinician summarizing the key clinical points for each chapter; locator menus; useful links; and a topic outline.

Sept 2007 • 1,344 pages • ISBN 978-1-58562-239-9 • Hardcover • \$275.00 • Item #62239

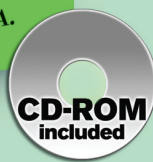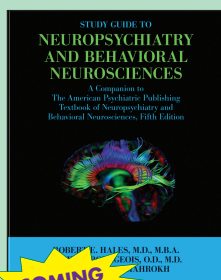

### Study Guide to Neuropsychiatry and Behavioral Neurosciences

A Companion to The American Psychiatric Publishing Textbook of Neuropsychiatry and Behavioral Neurosciences, Fifth Edition

Robert E. Hales, M.D., M.B.A.,  
James A. Bourgeois, O.D., M.D., and  
Narriman C. Shahrokh

*Study Guide to Neuropsychiatry and Behavioral Neurosciences* is a question-and-answer companion that allows you to evaluate your mastery of the subject matter as you progress

through the corresponding textbook. The *Study Guide* is made up of 246 questions divided into individual quizzes of 5-10 questions each that correspond to chapters in *The American Psychiatric Publishing Textbook of Neuropsychiatry and Behavioral Neurosciences*, Fifth Edition. Questions are followed by an Answer Guide that references relevant text (including the page number) in the *Textbook* to allow quick access to needed information. Each answer is accompanied by a discussion that addresses not only the correct response but also explains why other responses are not correct.

Sept 2007 • 224 pages • ISBN 978-1-58562-303-7 • Paperback  
\$37.95 • Item #62303

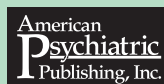

To order Call: **1-800-368-5777** or visit our website: **www.appi.org**

Please reference priority code AH755 when ordering.
