# THE JOURNAL OF NEUROPSYCHIATRY and Clinical Neurosciences

The Official Journal of the American Neuropsychiatric Association

## In this issue:

- The Cognitive Correlates of Functional Status: A Review From the Committee on Research of the American Neuropsychiatric Association
- Neurological Signs and Cognitive Performance Distinguish Between Adolescents With and Without Psychosis
- Pathological Gamblers Demonstrate Frontal Lobe Impairment Consistent With That of Methamphetamine-Dependent Individuals
- Longitudinal Evaluation of “Presymptomatic” Carriers of Huntington’s Disease

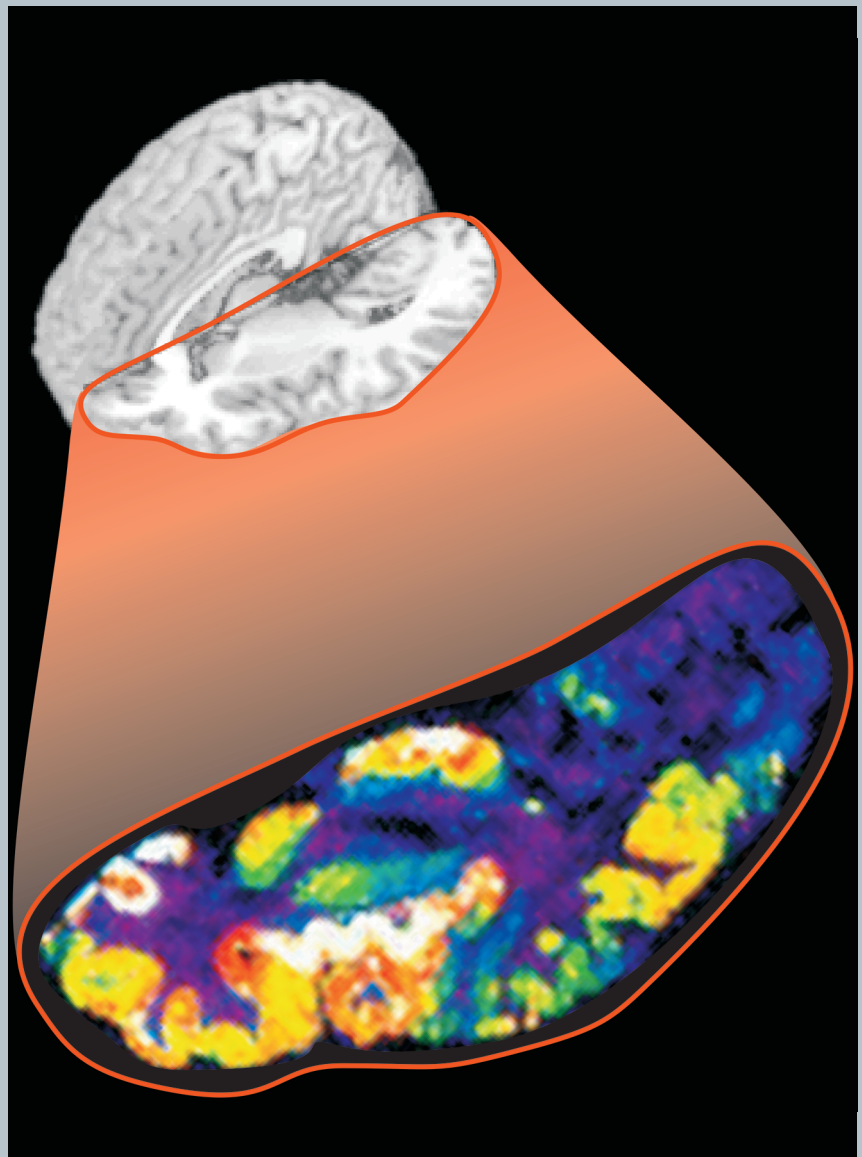

Source: https://psychiatryonline.org/doi/suppl/10.1176/jnp.2007.19.issue-3/suppl_file/cover.pdf
