# THE JOURNAL OF NEUROPSYCHIATRY and Clinical Neurosciences

The Official Journal of the American Neuropsychiatric Association

## In this issue:

- The Cognitive Correlates of Functional Status: A Review From the Committee on Research of the American Neuropsychiatric Association
- Neurological Signs and Cognitive Performance Distinguish Between Adolescents With and Without Psychosis
- Pathological Gamblers Demonstrate Frontal Lobe Impairment Consistent With That of Methamphetamine-Dependent Individuals
- Longitudinal Evaluation of “Presymptomatic” Carriers of Huntington’s Disease

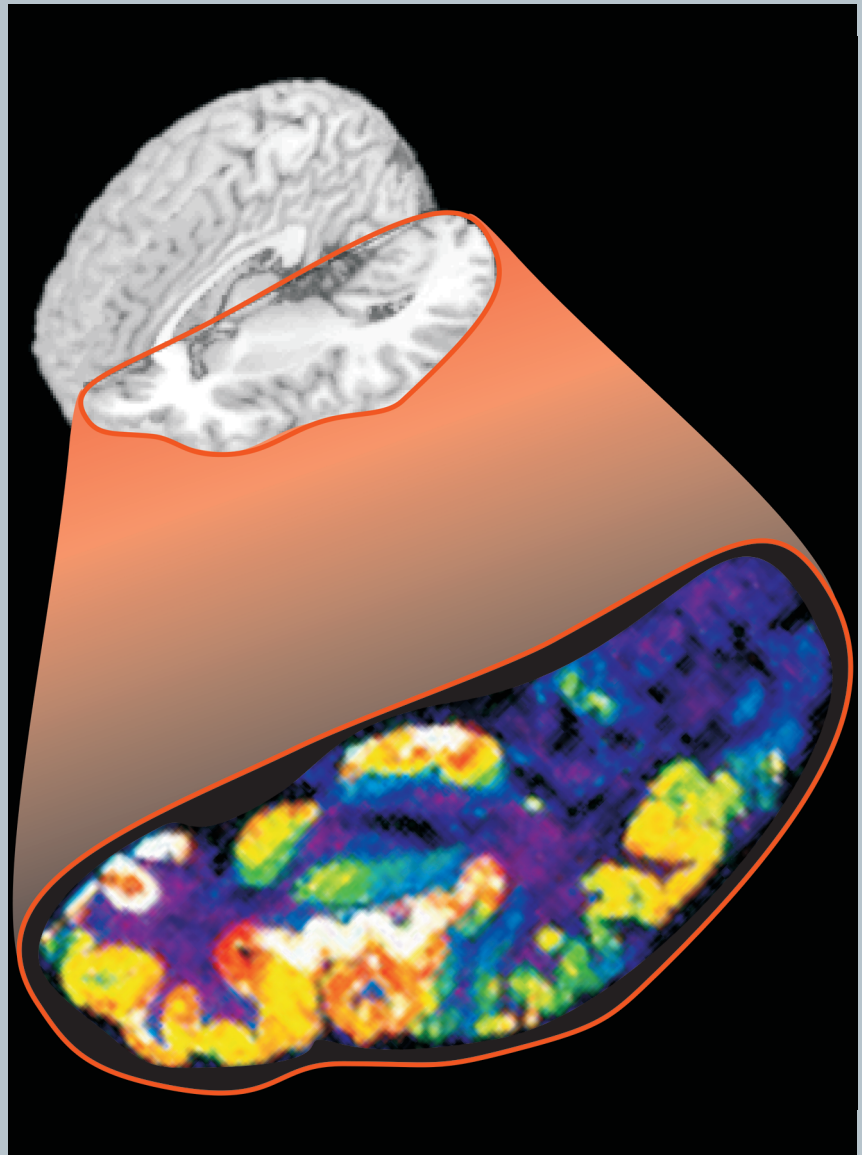

The United Council for Neurologic Subspecialties (UCNS) will be offering the third certification examination in Behavioral Neurology & Neuropsychiatry (BN&NP). The certification examination will be held on **October 6–10, 2008**. The deadline to apply for the examination is **April 15, 2008**.

The certification examination will last for 4 hours and will consist of 200 computerized multiple choice questions. Pearson VUE will administer the examination at Pearson Professional Centers across the United States. Candidates will have the option of choosing one of the 5 days to sit for the examination and will be able to select a location to minimize travel, if necessary.

For more information regarding BN&NP Certification, the application process, and corresponding fees, please visit our Web site at [www.ucns.org/certification](http://www.ucns.org/certification) or contact Todd A. Bulson, UCNS Certification Manager, at (651) 695-2813; [tbulson@ucns.org](mailto:tbulson@ucns.org) (e-mail).

The 2007 BN&NP certification examination will be held October 8–12, 2007. The diplomates list from the 2007 certification examination will be posted at <http://ucns.org/certification/diplomates>. The following is the list of diplomates from the 2006 UCNS BN & NP Certification Examination.

|                                                            |                                                     |                                                  |
|------------------------------------------------------------|-----------------------------------------------------|--------------------------------------------------|
| Muhammed K. Absar, M.D., Plymouth, MA                      | Daniel A. Drubach, M.D., Rochester, MN              | Michael E. Mahler, M.D., Los Angeles, CA         |
| John R. Absher, M.D., F.A.A.N., Greenville, SC             | Zeina N. El-Chemali, M.D., Boston, MA               | Thomas W. McAllister, M.D., Lebanon, NH          |
| Geoffrey L. Ahern, M.D., Ph.D., Tucson, AZ                 | David Feifel, M.D., San Diego, CA                   | Marsel Mesulam, M.D., F.A.A.N., Chicago, IL      |
| Iqbal Ahmed, M.D., Honolulu, HI                            | Richard B. Ferrell, M.D., Norwich, VT               | Vernon M. Neppe, M.D., Ph.D., Seattle, WA        |
| Michael P. Alexander, M.D., F.A.A.N.,<br>Newton Center, MA | Christopher M. Filley, M.D., Denver, CO             | Fred M. Ovsiew, M.D., Chicago, IL                |
| Clark A. Anderson, M.D., Denver, CO                        | Darren R. Gitelman, M.D., Wilmette, IL              | Robert N. Rubey, M.D., Denver, CO                |
| Karen E. Anderson, M.D., Olney, M.D.                       | D. Gregory Gorman, M.D., Bellevue, WA               | Douglas W. Scharre, M.D., Dublin, OH             |
| Piero Antuono, M.D., Wauwatosa, WI                         | Adarsh K. Gupta, M.D., Great Neck, NY               | Michael J. Schrift, D.O., Long Grove, IL         |
| David B. Arciniegas, M.D., Denver, CO                      | John Hart Jr., M.D., Dallas, TX                     | Angela Scicutella, M.D., Ph.D., Little Neck, NY  |
| David L. Bachman, M.D., Charleston, SC                     | Kenneth M. Heilman, M.D., F.A.A.N., Gainesville, FL | Jonathan M. Silver, M.D., New York, NY           |
| Anna M. Barrett, M.D., West Orange, NJ                     | Victor W. Henderson, M.D., Stanford, CA             | Joseph M. Tonkonogy, M.D., Westborough, MA       |
| Kevin J. Black, M.D., St. Louis, MO                        | Lawrence S. Honig, M.D., Ph.D., New York, NY        | Nutan Vaidya, M.D., North Chicago, IL            |
| Deborah N. Black, M.D., Barre, VT                          | Julie A. Janssen, M.D., Wenatchee, WA               | Jeff I. Victoroff, M.D., Rancho Palos Verdes, CA |
| Ivan G. Bodis-Wollner, M.D., D.Sc., Brooklyn, NY           | Judith H. Janz, M.D., New York, NY                  | Kytja S. Voeller, M.D., Scottsdale, AZ           |
| Bradley F. Boeve, M.D., Rochester, MN                      | Thomas S. Jensen, M.D., San Diego, CA               | James A. Wilcox, D.O., El Paso, TX               |
| John J. Campbell, M.D., Portland, ME                       | Gillian K. Karatinos, M.D., Tampa, FL               | Richard E. Wolin, M.D., Lewiston, NY             |
| Ovidio A. De Leon, M.D., Chicago, IL                       | Daniel Kaufer, M.D., Chapel Hill, NC                | Jonathan H. Woodcock, M.D., Thornton, CO         |
| Debra S. Demos, M.D., Loma Linda, CA                       | Richard E. Kennedy, M.D., Richmond, VA              | Mark T. Wright, M.D., Milwaukee, WI              |
| Gayarti Devi, M.D., New York, NY                           | Robert G. Kohn, D.O., McHenry, IL                   | Lester M. Zackler, M.D., Sherman Oaks, CA        |
|                                                            | Vassilis E. Koliatsos, M.D., Ruxton, M.D.           | Adnan B. Zawawi, M.D., Easton, PA                |

The UCNS has also accredited 15 fellowship programs as noted below. More details about the accredited fellowship programs can be found on our Web site at <http://ucns.org/apps/directory>.

Baylor College of Medicine  
Brigham and Women's Hospital  
Columbia University College of Physicians & Surgeons  
Dartmouth Medical School  
Emory University Hospitals  
Mayo Clinic (Rochester, MN)  
Mayo Clinic College of Medicine (Jacksonville, FL)  
McLean Hospital

Northwestern University  
The Johns Hopkins Hospital  
The University of Illinois at Chicago  
UCSF Memory and Aging Center  
University of Florida College of Medicine  
University of Colorado School of Medicine  
VA of Greater Los Angeles Healthcare System; UCLA  
Academic Affiliate
